# Supplementary material
Source: PubMed Central journal article supplement (PMC6964261)
Supplement: ao9b03192_si_001.pdf [file ao9b03192_si_001.pdf]

## SUPPLEMENTAL INFORMATION

# Aqueous Synthesis of Mesoporous Zr-based Coordination Polymer for Removal of Organic Dye

*Chenjia Liang,<sup>a,#</sup> Junhao Ren,<sup>a,#</sup> Samir El Hankari,<sup>a,\*</sup> Jia Huo<sup>a,b,\*</sup>*

<sup>a</sup> State Key Laboratory of Chem/Bio-Sensing and Chemometrics, Provincial Hunan Key Laboratory for Graphene Materials and Devices, College of Chemistry and Chemical Engineering, Hunan University, Changsha, 410082, Hunan, China ; <sup>b</sup> Shenzhen Research Institute of Hunan University, Shenzhen 518057, Guangdong, China

\*To whom correspondence should be addressed: E-mail: [jiahuo@hnu.edu.cn](mailto:jiahuo@hnu.edu.cn); [elhankari@hnu.edu.cn](mailto:elhankari@hnu.edu.cn)

# These authors contributed equally to this paper.

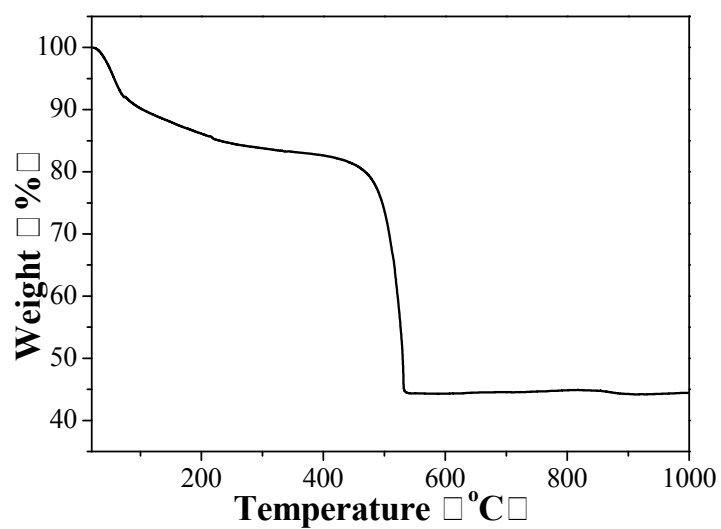

Figure S1. TG curves of Zr-BDC-CP under Ar atmosphere

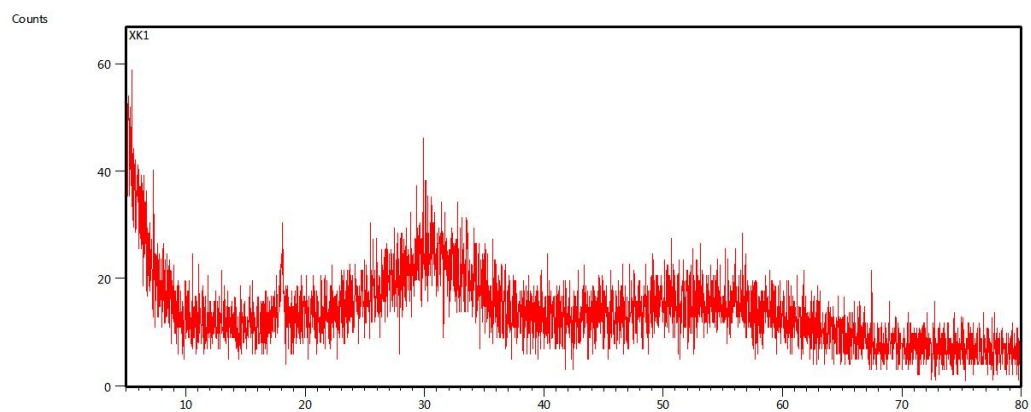

Figure S2. The PRXD pattern of Zr-BDC-CP

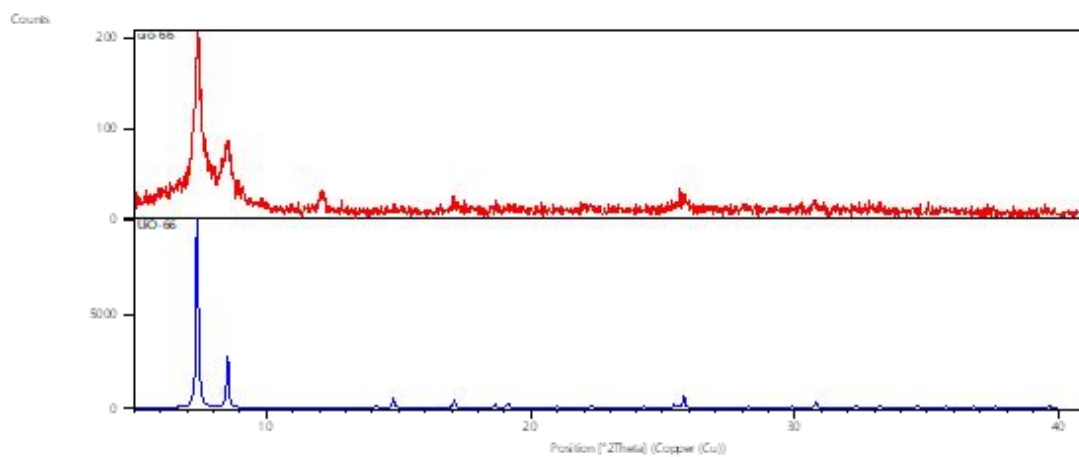

Figure S3. The simulated (bottom) and experimental (upper) PXRD patterns of UIO-66

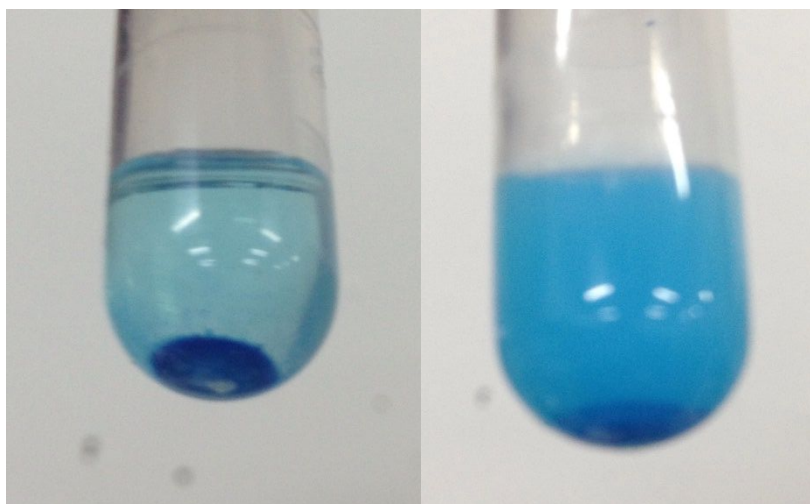

**Figure S4.** The photos of dye solutions after adsorption for Zr-BDC-CP (left) and UIO-66 (right) (the initial dye solution is 100mg/L).

**Table S1 Comparison of MB adsorption among different MOFs.**

| Material                                    | Quality (mg) | Concentration (mg/L) | Volume (ml) | Efficiency (%) | Amount adsorbed (mg/g) | Ref       |
|---------------------------------------------|--------------|----------------------|-------------|----------------|------------------------|-----------|
| MOF-235                                     | 5            | 20                   | 50          | 93.5           | 187                    | [1]       |
| ZJU-24-0.89                                 | 5            | 200                  | 50          | 45.1           | 902                    | [2]       |
| NOTT-101                                    | 5            | 200                  | 50          | 20.0           | 400                    | [2]       |
| Fe <sub>3</sub> O <sub>4</sub> @MIL-100(Fe) | 10           | 75                   | 10          | 66.3           | 49.41                  | [3]       |
| MIL-101(Cr)                                 | 20           | 30                   | 20          | -              | 11                     | [4]       |
| Cu-BTC                                      | 5            | 3.2                  | 10          | -              | 4.4                    | [5]       |
| UiO-66                                      | 50           | 100                  | 5           | 35.8           | 3.71                   | This work |
| Zr-BDC-CP                                   | 50           | 100                  | 5           | 94.5           | 9.78                   | This work |
| Zr-BDC-CP                                   | 50           | 400                  | 5           | 93.5           | 38.17                  | This work |

## References

- [1] Enamul H.; Jong W.J.; Sung H.J., Adsorptive removal of methyl orange and methylene blue from aqueous solution with a metal-organic framework material, iron terephthalate (MOF-235). *J. Hazard Mater.* **2011**, *185*, 507-511.
- [2] Zhang Q.; Yu J.C.; Cai J.F.; Song R.J.; Cui Y.J.; Yang Y.; Chen B.L.; Qian G.D., A porous metal-organic framework with -COOH groups for highly efficient pollutant removal. *J. Chem Commun.* **2014**, *50*, 14455-14458.
- [3] Shao Y.M.; Zhou L.C.; Bao C.; Ma J.J.; Liu M.Z.; Wang F., Magnetic responsive metal-organic frameworks nanosphere with core-shell structure for highly efficient removal of methylene blue. *J. Chem Eng.* **2016**, *283*, 1127-1136.
- [4] Shen T.; Luo J.; Zhang S.; Luo X. Hierarchically mesostructured MIL-101 metal-organic

frameworks with different mineralizing agents for adsorptive removal of methyl orange and methylene blue from aqueous solution. *J. Environ. Chem. Eng.* **2015**, *3*, 1372-1383.

- [5] Lin S.; Song Z.; Che G.; Ren A.; Li P.; Liu C.; Zhang J. Adsorption behavior of metal–organic frameworks for methylene blue from aqueous solution. *Micro. Meso Mater.*, **2014**, *193*, 27-34
